# Supplementary material
Source: publisher figshare collection journal article supplement (https://gsapubs.figshare.com/ndownloader/files/28309986)
Supplement: Supplementary file 1 [file 28309986]

## Sheet: Table S1
Holm-Alwmark, S., 2021, Impact cratering record of Sweden—A review, in Reimold, W.U.,
and Koeberl, C., eds., Large Meteorite Impacts and Planetary Evolution VI:
Geological Society of America Special Paper 550, https://doi.org/10.1130/2021.2550(01).
TABLE S1. COMPOSITION OF IMPACTITES FROM DELLEN AND THE TARGET LJUSDAL GRANITE FROM SELECTED AUTHORS
Sample	Avg. whole rock impact melt rock	Avg. glass matrix	Avg. impact melt rock	Avg. impact melt rock (their De3, De3/3, De 3/5)	Impact melt rock (their De 9/1)	Mean Dellen impactites	Avg. impact melt rock	Suevitic impact breccia	Avg. Impact glass	Ljusdal granite
Reference	Mäerz (1979)	Mäerz (1979)	Deutsch et al. (1992)	Schmidt et al. (1997)	Schmidt et al. (1997)	Schmidt et al. (1997)	Tagle et al. (2008)	Tagle et al. (2008)	Mark et al. (2014)	Högdahl et al. (2008)
wt.%
SiO2	69.93	75.2	69.8	68.48	50.28		66.3	65	70.08	71.9
TiO2	0.37	0.35	0.55	0.54	1.12		0.59	0.66	0.46	0.34
Al2O3	14.17	13	14.08	13.52	16.34		15.1	14.2	12.17	14.4
Fe2O3*	-	-	-	4.47	9.64		4.79	5.47	-	2.95
FeO	4.93	2.35	3.83	-	-		-	-	2.52	-
MnO	0.05	0.06	0.06	0.06	0.16		0.05	0.04	0.05	0.03
MgO	0.93	0.2	0.81	1.02	7.63		1.21	1.45	0.3	0.8
CaO	2.23	0.95	2.14	2.17	12.33		2.97	2.89	1.13	1.94
Na2O	1.9	2.9	2.72	2.86	2.26		3.06	1.92	2.85	3.12
K2O	5.07	6.05	4.42	4.37	0.24		4.22	4.88	5.17	4.9
P2O5	-	-	0.14	0.12	0.11		0.14	0.16	0.14	0.18
SO3	-	-	-	-	-		<0.10	<0.10	-	-
Cl	-	-	-	-	-		-	-	0.02	-
SO2	-	-	-	-	-		-	-	0.05	-
SrO	-	-	-	-	-		-	-	0.02	-
Cr2O3	-	-	-	-	-		-	-	n.d.	-
NiO	-	-	-	-	-		-	-	n.d.	-
F	-	-	-	-	-		-	-	0.19	-
total	99.63	101.05	100.18	100.4	100.67		99.6	99.4	95.41†	100.6
LOI	-	-	-	-	0.31		-	-	-	0.5
μg/g
Be	-	-	-	-	-		-	-	-	2
Sc	-	-	-	7.66667	30		-	-	-	-
V	-	-	-	26	210		52	57	-	28
Cr	-	-	-	15.6667	361		18	N.d.§	-	-
Co	-	-	-	9	41		8	N.d.	-	42.3
Ni	-	-	-	37	133		12	N.d.	-	-
Cu	-	-	-	37	118		-	<30	-	-
Zn	-	-	-	54	80		63	77	-	-
Ga	-	-	-	19	17		-	-	-	17.6
Rb	-	-	-	224	11		198	210	-	222
Sr	-	-	-	118.333	241		177	231	-	154.8
Y	-	-	-	45.3333	23		65	68	-	23
Zr	-	-	-	247.333	79		319	359	-	176
Nb	-	-	-	-	-		-	-	-	14.1
Sn	-	-	-	-	-		-	-	-	4
Ba	-	-	-	629	93		589	719	-	448
La	-	-	-	-	-		-	-	-	45.6
Ce	-	-	-	-	-		86	90	-	88
Pr	-	-	-	-	-		-	-	-	10.6
Nd	-	-	-	-	-		-	-	-	36
Sm	-	-	-	-	-		-	-	-	6.9
Eu	-	-	-	-	-		-	-	-	0.83
Gd	-	-	-	-	-		-	-	-	5.38
Tb	-	-	-	-	-		-	-	-	0.78
Dy	-	-	-	-	-		-	-	-	3.93
Ho	-	-	-	-	-		-	-	-	0.71
Er	-	-	-	-	-		-	-	-	1.95
Tm	-	-	-	-	-		-	-	-	0.26
Yb	-	-	-	-	-		-	-	-	1.44
Lu	-	-	-	-	-		-	-	-	0.25
Hf	-	-	-	-	-		-	-	-	6
Ta	-	-	-	-	-		-	-	-	1.4
Th	-	-	-	-	-		20	16	-	33.3
U	-	-	-	-	-		-	-	-	3.9
ng/g
Os	-	-	-	-	-	0.12 ± 0.07	-	-	-	-
Re (pg/g)	-	-	-	-	-	80 ± 30	-	-	-	-
Ru	-	-	-	-	-	2.17 ± 0.67	0.22	0.06	-	-
Rh	-	-	-	-	-	0.81 ± 0.40	0.07	0.01	-	-
Pd	-	-	-	-	-	2.43 ± 0.77	0.37	<0.13	-	-
Ir	-	-	-	-	-	0.48 ± 0.23	0.23	<0.04	-	-
Pt	-	-	-	-	-	-	0.56	0.07	-	-
Au	-	-	-	-	-	0.71 ± 0.26	-	-	-	-
For methods and errors, see original publications.
*Total Fe expressed as Fe2O3
†The data suggest that the impact glass contains up to 4.6 wt% water (and other volatiles)
§N.d. = none detected.
